# Supplementary material for: Dual role of the Toxoplasma gondii clathrin adaptor AP1 in the sorting of rhoptry and microneme proteins and in parasite division
Source: PLoS Pathog. 2017 Apr 21;13(4):e1006331. doi: 10.1371/journal.ppat.1006331 (PMC5415223; doi:10.1371/journal.ppat.1006331)
Supplement: S2 Fig — Detailed list of proteins identified by mass spectrometry after immunoprecipitation of the μ1-HA subunit using anti-HA antibodies in KI parasites expressing μ1-HA under the endogenous promotor. The parental strain RHΔKU80 has been used as a control for non-specific binding on the anti-HA antibody coated beads. (XLSX) [file ppat.1006331.s002.xlsx]

## Sheet: Feuil1
			Total number of spectrum		Total number of peptide		Percentage sequence coverage		Peptide sequence		Number of shared peptide		Other Proteins
Protein name	Protein accession numbers	Protein molecular weight (Da)	p1 T- RHDKu80	p2 T- mu1-HA	p1 T- RHDKu80	p2 T- mu1-HA	p1 T- RHDKu80	p2 T- mu1-HA	p1 T- RHDKu80	p2 T- mu1-HA	p1 T- RHDKu80	p2 T- mu1-HA	p1 T- RHDKu80	p2 T- mu1-HA
mu1 adaptin	TGGT1_289770,TGME49_289770,TGVEG_289770	48918.1		55		11		22.8%		DFVMTATFGLPSVGVEAR-FEIPYFTVSGITVR-GNVSLASAAER-KPINVKFEIPYFTVSGITVR-LGLNDKLLLETSGR-LNLLVSSNGTVLR-LNTQVKPLIWIDAVVDTGR-NSNAmmLLSFLYK-SVASGVEIHVPVPPDADSPHFK-TISFIPPDGEFELmSYR-YITQNGEYQLR		0		0
gamma 1 adaptin	TGGT1_313670	107036		53		20		27.5%		ASPQGIPPHASGAPSSGAGVAGGSAVGASSGDK-ASQVSHGDSLFDEKPAQR-DILLDcLKDQDLSLR-DPSLVSTMR-FETSNNVEVQQR-GDAESSASLSDVLAHVATNTEGAK-GHLLSPNGGGSmTEDTLAITPR-KTNDLLDLDDLLNMGYSSESR-LLAcLPALLADR-NVGNSVLYEcVR-QGQSGSTATLLHEASGSEK-QGQSGSTATLLHEASGSEKGASIR-QGVLTQTLLTAAAKLAAR-RFETSNNVEVQQR-SLSSLGSGSFASLLSGR-TIMTIEDDPGLR-TNDLLDLDDLLNmGYSSESR-VLALLAKGDAESSASLSDVLAHVATNTEGAK-VLGVNILGR-YVALGTLQQVVR		0		0
beta adaptin	TGGT1_240870	101920		47		18		25.5%		AQPELAILAINTFR-ASMVWIVGEYVDR-ESSDDLFDLSSPPEDPR-EYATEVDVDFVR-IEKLDILVR-KDSLDPNPLIR-KVVFAPKPPINEDADALDYNTLDR-LcPPLVTLLSAEPEIQYVALR-LEEITEYLVEPLR-LLDKVTNPDVVR-MATEETYNPDLR-NVDQVLSELKEYATEVDVDFVR-QMQAANISLVAQR-SEAAALLPLFTSTVcAALR-SSTTLNGWAIQFNR-tDGNYFQPAKR-TGLQVSAALTR-VVFAPKPPINEDADALDYNTLDR		0		0
RNA recognition motif-containing protein	TGGT1_236540,TGME49_236540,TGVEG_236540	53018		39		10		25.6%		AEGGFDIHSDDVVLGVTGDGR-ASEEEFQKADDR-EQAIKDLHGR-FFKAEGGFDIHSDDVVLGVTGDGR-GGFDGFYHGGFNSGPmR-GLPWScSENEIVR-mIELFPSSKQEmEFAAQGGDPR-QEMEFAAQGGDPR-TTGEAYVQLPDPGLR-TVMAAISGNTDSLDASR		0		0
nuclear transport factor 2 (ntf2) domain-containing protein	TGGT1_243960,TGVEG_243960	84179.8		38		15		25.8%		APNAPATPISPR-EAVVPSSPSPR-EDAPNVDASTPDANWPRPGETK-EGETGADGGQWIDAGK-FIDAQENKDGGMLILVAGR-FNEGQAVEIR-FYDFDSQmIR-GEYSGPKGEGAFEDEGR-GPGGPAPGAQAGAAAGAGQER-GSVGGDSVR-KETVEEPQR-KFNEGQAVEIR-QSAEYLmQQGLYVR-VGTPAASGAASWGAQGAGEGAEGPTR-VGTPAASGAASWGAQGAGEGAEGPTRGDGPPAGAK		0		0
RNA recognition motif-containing protein	TGGT1_270880	138994		19		10		11.4%		AVPGHAGGSPAGTHGSDTGYGSGMGR-ELSSVPAVPPR-FETGPGGRPPEEGGmDSGSPPAFHR-GAEGHGGDSGLPGNSLR-GGGPWGGGSPR-GSGPGmGPPDGR-GSGSAPPAGQPLPGR-GWDQSSPGYSAGR-HLQLAGAHPSSQGER-TDImLSSSGER		0		0
hypothetical protein	TGGT1_320010,TGME49_320010	98243		16		6		9.44%		GADEGYGPPcGSAPR-HESPENGASAALFEGVEEK-TGDPAVSSQPAAYGGYR-TNALEGFPmIDmDR-VPASVMQHSR-WPPAGASDSNPGGSAR		0		0
putative transport protein Sec24	TGGT1_277000,TGME49_277000,TGVEG_277000	108035		15		7		12.3%		DAVLEALDTIPSLWR-LPGcTDSGAGR-LQHSQQLENDIVHIITR-SAGGIPSSPFHAATPANPGAAPPPR-SGGLAGADGAGTDGGSR-SQLQAPAPPMIPAAGGAAPPLQQPR-VLDGQEEVILPPALR		0		0
WD domain: Sec31_like	TGGT1_311400,TGME49_311400,TGVEG_311400	165580		13		7		7.57%		ASGAAAPEPQVGLHGDPSLSQR-GIVNAALNPmDSR-GTGPQAPPPIHPGVQPPSADQHR-LAPGAPGLKQPAR-LGSSQSGPVDWSSEVGSLVR-SGELSSSASQR-SSALVEAFTLPESEVVKR		0		0
putative polyadenylate binding protein	TGGT1_224850,TGME49_224850,TGVEG_224850	82697.8		8		5		8.32%		FGSITSLVVR-GYGFVHYENEESAR-NMDDSIDDEKLR-NMPSAWEDESR-SLGYAYVNYQGIQDAER		0		0
DEAD (Asp-Glu-Ala-Asp) box polypeptide 17	TGGT1_236650,TGME49_236650,TGVEG_236650	59939.3		8		5		12.5%		ILIFAETKR-NFYVEHPAVANMSAEEAER-NPIMVATDVASR-SGGFGGGPNALPLGSRPY-VTYLVMDEADR		0		0
hypothetical protein	TGGT1_313270	281192		7		4		1.96%		DPGSGPTAVGGAPR-NEmLAPPLLPGR-SNSGSTPPAVADALLTR-VAPETIAAIWAR		0		0
DEAD (Asp-Glu-Ala-Asp) box polypeptide DDX3X	TGGT1_226250,TGME49_226250,TGVEG_226250	78594.5		6		4		6.95%		ELAMQIYEEAR-LGLVQFFVLDEADR-QGGAGYGSMGGVGGR-TAAFLYPIIAR		0		0
putative clathrin heavy chain	TGGT1_290950,TGME49_290950,TGVEG_290950	194480		6		4		2.72%		ALELYTDIADIKR-LEDFAASVDAAR-TLDAQLAVR-WVAPTLLALVTDR		0		0
beta-tubulin	TGGT1_266960,TGME49_266960,TGVEG_266960	50073.2		5		5		14.0%		AILMDLEPGTMDSVR-FPGQLNSDLR-GHYTEGAELIDSVLDVVR-LAVNLIPFPR-VSDQFTAMFR		0		0
WD domain: sec13_like	TGGT1_201700,TGME49_201700,TGVEG_201700	67410.7		5		3		6.12%		DVAFQPASASSLLLSSSR-QSAAAVPQGPQTR-TATFLQELR		0		0
RNA recognition motif-containing protein	TGME49_321500	50937.2		4		2		5.05%		FAFKEEALHAVR-mDSIAAADAAIR		0		0
putative clathrin assembly protein AP19 : sigma 1	TGGT1_270370,TGME49_270370,TGVEG_270370	19679.1		4		2		10.9%		VmNAQDALmEESNTK-VMNAQDALMEESNTKGGVK		0		0
putative glycogen synthase	TGGT1_222800	325366		3		3		1.40%		LGVPNVFAPDTSAGR-NALGAIcFVTPELGR-SVAVAGTFDDWR		0		0
splicing factor U2AF family SnRNP auxilary factor large subunit	TGGT1_319850,TGME49_319850,TGVEG_319850	51682		3		3		9.70%		DKGNYGFVEFATVEETER-LADSEGHEPIR-TGAASTQAGSDAATMNSTR		0		0
ribosomal protein RPS11	TGGT1_226970,TGME49_226970,TGVEG_226970	18676.8		3		3		18.0%		cPFTGNVSIR-DVGLGFQTPR-QDGVSSLGR		0		0
Sec23/Sec24 trunk domain-containing protein	TGGT1_291680,TGME49_291680,TGVEG_291680	87597.2		3		3		5.06%		FAEPNTIDVAPGFDQEAAAVLMTR-LAVFKTESEESLDVLR-TESEESLDVLR		0		0
hypothetical protein	TGGT1_237290,TGME49_237290,TGVEG_237290	222436		3		2		1.10%		ADSAAAFSR-ALFAPGGAASHEER		0		0
nucleoporin autopeptidase	TGGT1_259640,TGME49_259640,TGVEG_259640	305828		3		2		0.958%		SAVEALLmQR-TASPLEDESKGGQANALR		0		0
ribosomal protein RPL18A	TGGT1_262670,TGME49_262670,TGVEG_262670	21330.8		2		2		11.5%		ISQYQVVGR-STGEILAVNEIR		0		0
ribosomal protein RPL9	TGGT1_284560,TGME49_284560,TGVEG_284560	21424		2		2		10.5%		ATNVKDEIALTGTDVELVSR-DEIALTGTDVELVSR		0		0
ribosomal protein RPL13A	TGGT1_292130,TGME49_292130,TGVEG_292130	32749.3		2		2		10.8%		LGDLSSQVGWSHGDLVAR-LQVFEGVPTMVER		0		0
microneme protein MIC3	TGGT1_319560,TGME49_319560,TGVEG_319560	40526.6		2		2		7.31%		AEEScVEGVEVTLAEK-GESGSEGSLSEK		0		0
ribosomal protein RPS15A	TGGT1_234450,TGME49_234450,TGVEG_234450	26589.8		2		1		5.63%		GYIGDFEIVDDHR		0		0
putative U2 snRNP auxiliary factor	TGGT1_236910,TGME49_236910,TGVEG_236910	29492.1		2		1		6.69%		YTDEEAANKALAALQGR		0		0
ribosomal protein RPS10	TGGT1_275810,TGME49_275810,TGVEG_275810	17398.5		2		1		10.5%		HPEVPVPNLHVMmTLR		0		0
ribosomal protein RPS3	TGGT1_232300,TGME49_232300,TGVEG_232300	28637.6		1		1		5.49%		FGFAPDSVELFAER		0		0
hypothetical protein	TGGT1_216470,TGME49_216470,TGVEG_216470	54132.7		1		1		2.99%		NVDALLHALDEDYLR		0		0
FUSE-binding protein 2 / KH-type splicing regulatory protein	TGGT1_216670,TGME49_216670,TGVEG_216670	100048		1		1		1.17%		AAEEGLLLLDR		0		0
ribosomal protein RPL3	TGGT1_227360,TGME49_227360,TGVEG_227360	44056.5		1		1		4.11%		AVFTEGEMIDVIGVTK		0		0
putative chaperonin cpn60	TGGT1_240600,TGME49_240600,TGVEG_240600	72224.8		1		1		2.25%		NQLLEGIEAVAGAVR		0		0
zinc finger (CCCH type) motif-containing protein	TGGT1_268570,TGME49_268570,TGVEG_268570	47091.9		1		1		2.23%		FSVEEIAALR		0		0
ribosomal protein RPL4	TGGT1_309120,TGME49_309120,TGVEG_309120	45748.2		1		1		4.09%		VDSLNLLQLAPGGALGR		0		0
SAG-related sequence SRS29B	TGGT1_233460,TGME49_233460,TGVEG_233460	34828.5		1		1		4.46%		TALTEPPTLAYSPNR		0		0
ENTH domain-containing protein	TGGT1_214180,TGME49_214180,TGVEG_214180	65903.4		1		1		1.89%		LAFDPELLKEER		0		0
