# Supplementary material for: Dual role of the Toxoplasma gondii clathrin adaptor AP1 in the sorting of rhoptry and microneme proteins and in parasite division
Source: PLoS Pathog. 2017 Apr 21;13(4):e1006331. doi: 10.1371/journal.ppat.1006331 (PMC5415223; doi:10.1371/journal.ppat.1006331)
Supplement: S8 Fig — Detailed list of proteins identified following immunoprecipitation of the over-expressed cMycμ1 in DDμ1-induced parasites using anti-cMyc antibodies. The parental strain RH was used as a control for non-specific binding on the anti-cMyc antibody coated beads. (XLSX) [file ppat.1006331.s008.xlsx]

## Sheet: Feuil1
			Total number of spectra		Total number of peptides		Percentage sequence coverage		Number of shared peptide
Protein name	Protein accession numbers	Protein molecular weight (Da)	RH	DDmu1	RH	DDmu1	RH	DDmu1	RH	DDmu1
beta adaptin protein	TGGT1_240870	101920		160		51		68.3%		0
gamma1 subunit	TGGT1_313670,TGME49_313670,TGVEG_313670	107036		189		49		73.1%		0
mu1 subunit	TGGT1_289770,TGME49_289770,TGVEG_289770	48918.1	1	148	1	28	2.79%	73.5%	0	0
Sigma1 subunit	TGGT1_270370,TGME49_270370,TGVEG_270370	19679.1		63		9		59.8%		0
ribosomal protein RPS12	TGGT1_205340,TGME49_205340,TGVEG_205340	15398.3	1	5	1	5	9.15%	47.9%	0	0
putative peptidase M16 family potein	TGGT1_236210,TGME49_236210	56916.4	2	5	2	5	4.91%	20.6%	0	0
putative glutamine-dependent NAD(+) synthetase protein	TGGT1_269800,TGVEG_269800	94475.2		6		5		10.3%		0
ribosomal protein RPS16	TGGT1_263040,TGME49_263040,TGVEG_263040	24001.7	3	5	2	4	12.3%	24.2%	0	0
redoxin domain-containing protein	TGGT1_286630,TGME49_286630,TGVEG_286630	31121.5	2	5	2	4	10.3%	20.5%	0	0
putative DnaJ family chaperone	TGGT1_311240,TGME49_311240,TGVEG_311240	47449	2	5	2	4	2.82%	11.3%	0	0
fructose-bisphospatase I	TGGT1_205380,TGME49_205380,TGVEG_205380	42233.5	1	4	1	4	2.58%	11.6%	0	0
cyclophilin	TGGT1_221210,TGME49_221210,TGVEG_221210	19639	1	4	1	4	4.47%	39.7%	0	0
RNA recognition motif-containing protein	TGGT1_305850,TGME49_305850,TGVEG_305850	39167.9	3	4	2	4	9.14%	15.6%	0	0
putative TCP-1 chaperonin	TGGT1_318410,TGME49_318410,TGVEG_318410	58666.7	2	4	2	4	7.45%	13.6%	0	0
ENTH domain-containing protein	TGGT1_214180,TGME49_214180	65903.4		4		4		10.4%		0
